# Supplementary material
Source: PubMed Central journal article supplement (PMC2893577)
Supplement: NIHMS207336-supplement-1_si_001.pdf [file NIHMS207336-supplement-1_si_001.pdf]

# Effect of Temperature During Assembly on the Structure and Mechanical Properties of Peptide-Based Hydrogels

*Sivakumar Ramachandran, Marc B. Taraban, Jill Trehwella, Ignacy Gryczynski, Zygmunt Gryczynski, and Yihua Bruce Yu\**

## Supporting Information

### Table of Contents

|                                                                                                                                                 |    |
|-------------------------------------------------------------------------------------------------------------------------------------------------|----|
| <b>Figure S1.</b> $^1\text{H}$ NMR spectrum of the formylation reaction reagent, 2,4,5-trichlorobenzyl formate. ....                            | s2 |
| <b>Figure S2.</b> Full scattering profiles $I(q)$ vs $q$ over time during the process of gelation of the EAW10:OAW10 pair at 25°C and 5°C. .... | s3 |

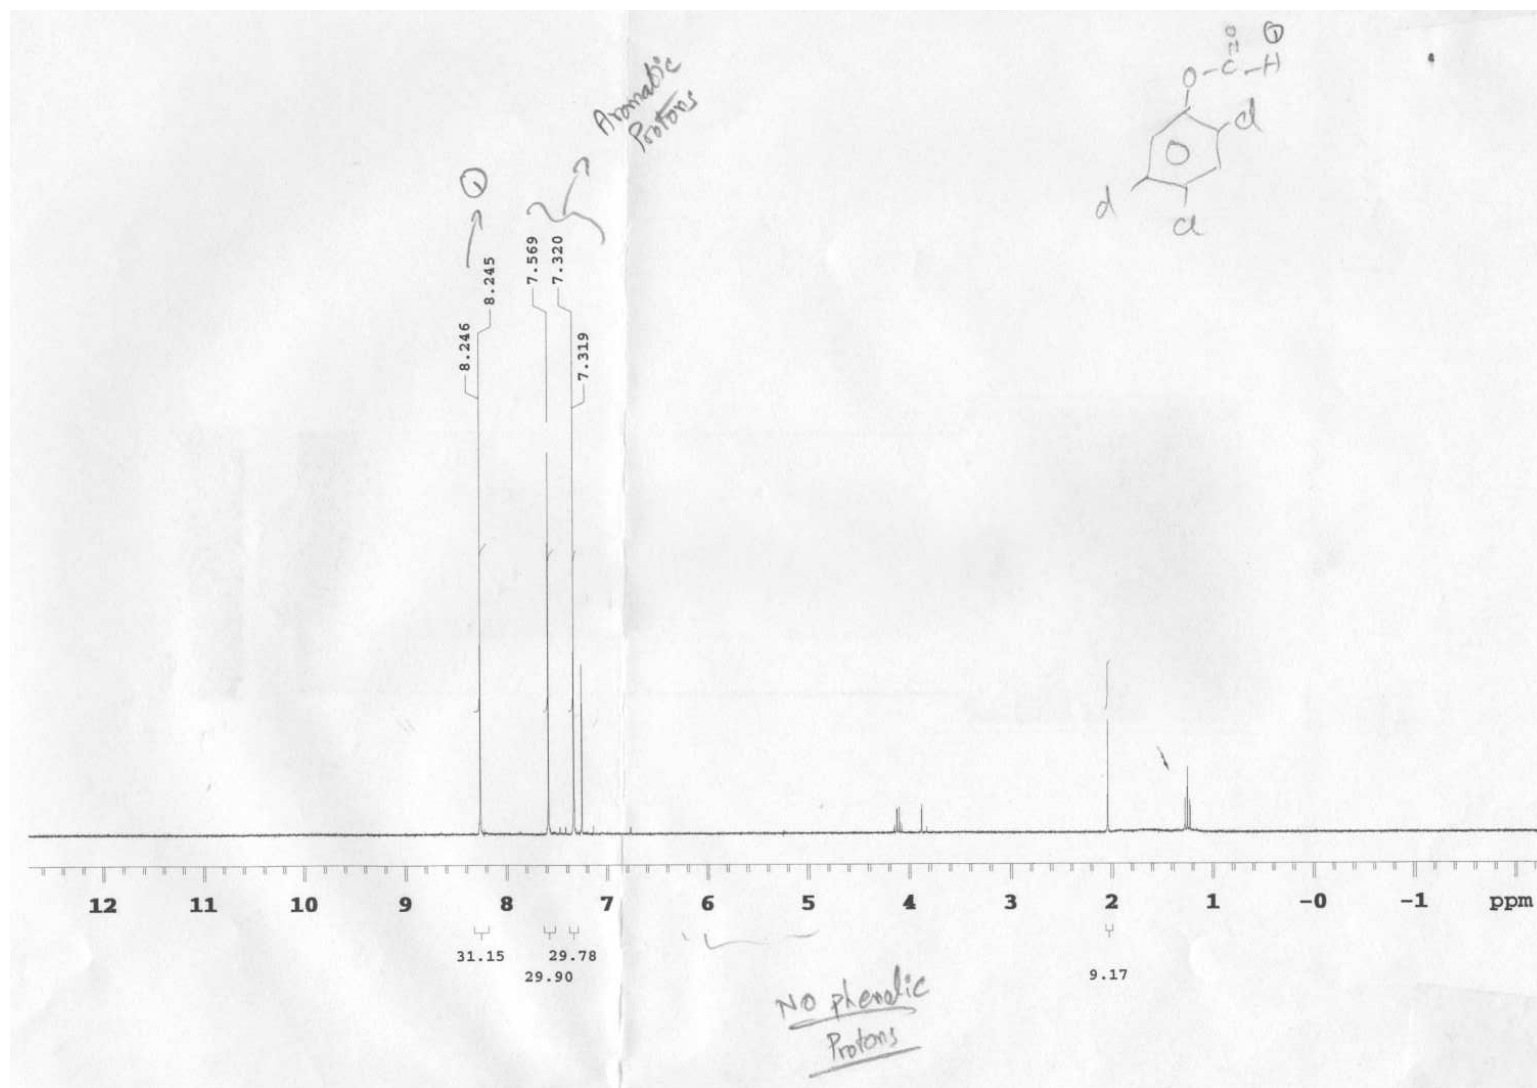

Figure S1. <sup>1</sup>H NMR spectrum of the formylation reaction reagent, 2,4,5-trichlorobenzyl formate.

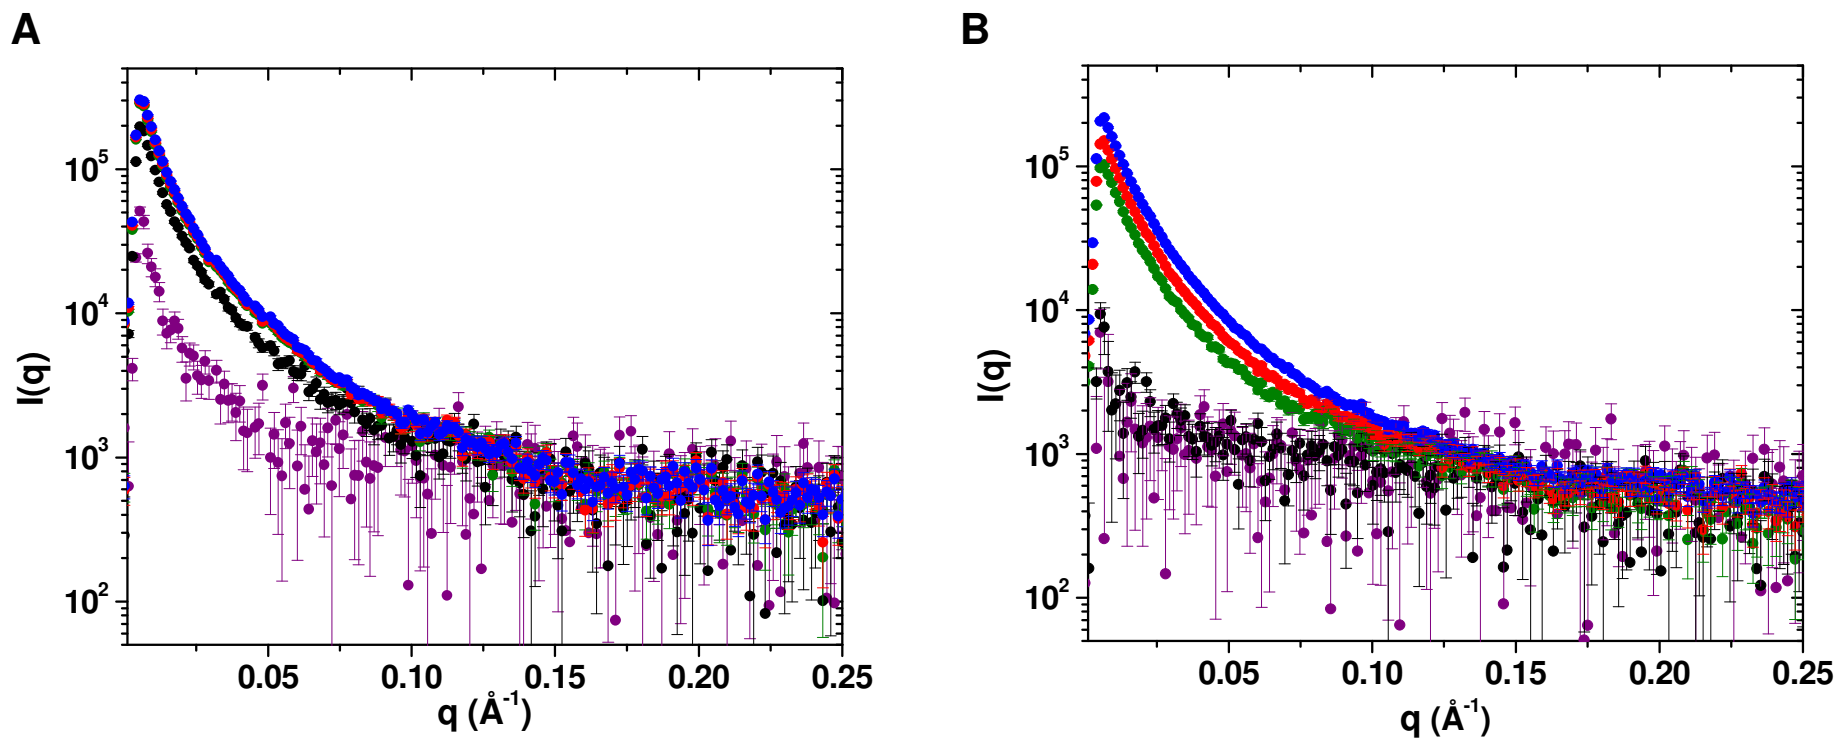

**Figure S2.** Increase of  $I(q)$  vs  $q$  over time during the gelation of the OAW10:EAW10 pair: (A) 25°C; (B) 5°C. 15 min, purple; 1 hr, black; 5 hr, green; 8 hr, red; 24 hr, blue.
